# Supplementary material for: Clustering of Health-Related Behavior Patterns and Demographics. Results From the Population-Based KORA S4/F4 Cohort Study
Source: PubMed Central journal article supplement (PMC6350271; doi:10.3389/fpubh.2018.00387), 2019-01-22
Supplement: Data_Sheet_1.pdf [file Data_Sheet_1.pdf]

Appendix

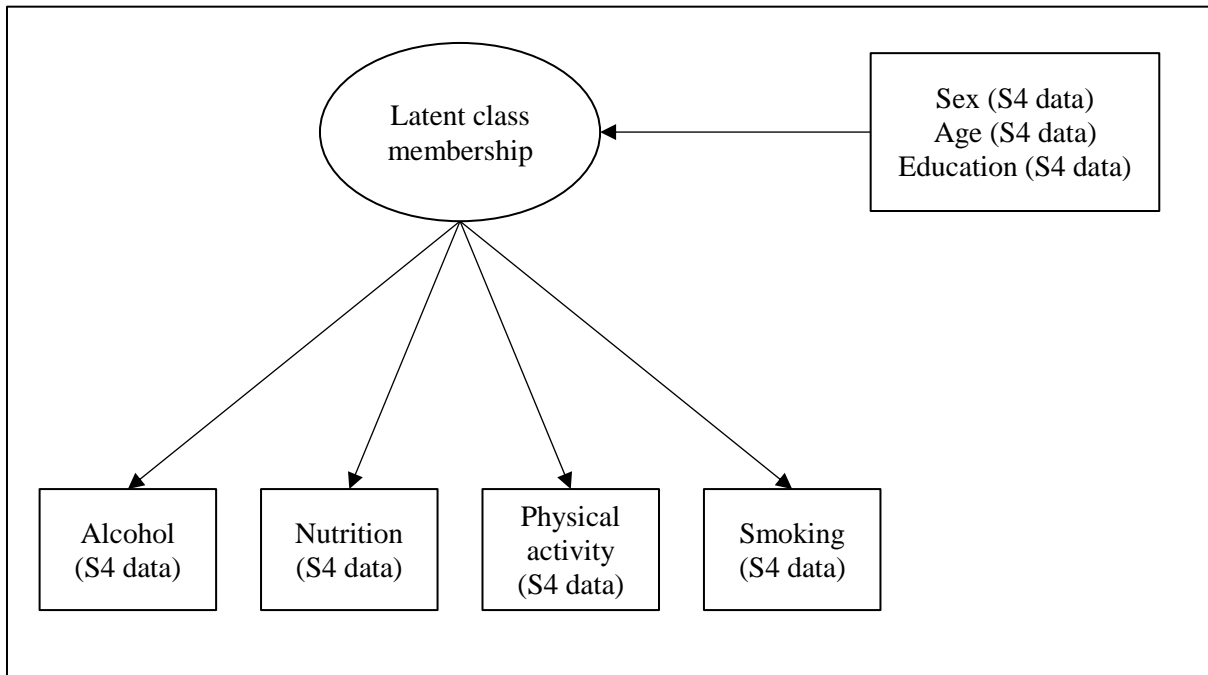

**Figure A1. The latent class regression model.**

A graphical description of the latent class regression model based on baseline (S4) data.

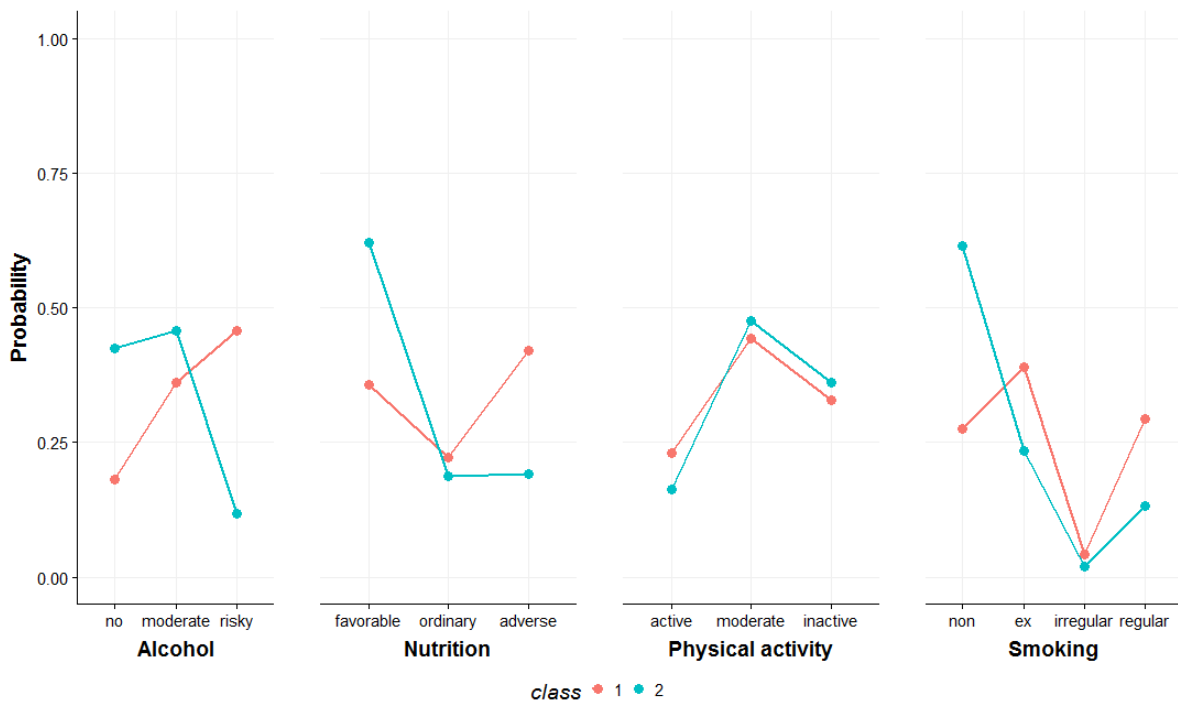

**Figure A2. Two-class-conditional item probabilities.**

The figure shows the probabilities of each health behavior category conditional on latent class membership for a two-class model.

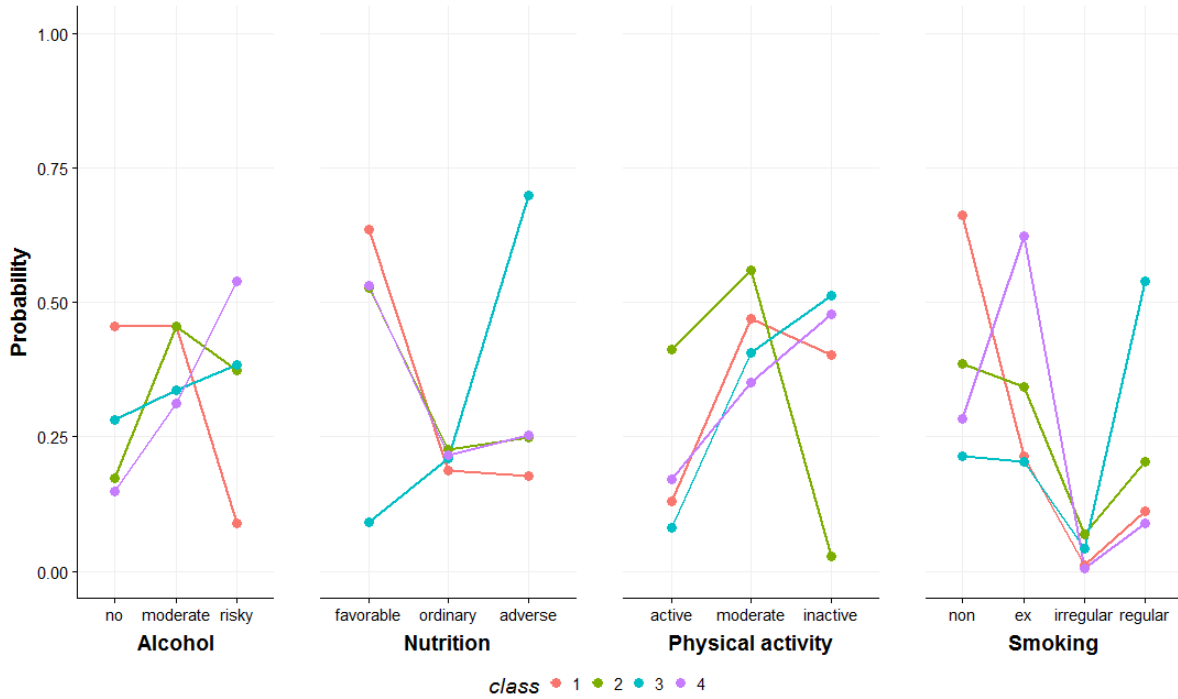

**Figure A3. Four-class-conditional item probabilities.**

The figure shows the probabilities of each health behavior category conditional on latent class membership for a three-class model.

**Table A1. Three-class-conditional item probabilities exact values**

Referring to Figure 3 in the manuscript, this table shows the exact numerical values of the class-conditional item probabilities.

|                          |                  | Class 1 | Class 2 | Class 3 |
|--------------------------|------------------|---------|---------|---------|
| <b>Alcohol</b>           | <b>no</b>        | 0.133   | 0.450   | 0.254   |
|                          | <b>moderate</b>  | 0.355   | 0.469   | 0.374   |
|                          | <b>risky</b>     | 0.512   | 0.081   | 0.372   |
| <b>Nutrition</b>         | <b>favorable</b> | 0.543   | 0.630   | 0.200   |
|                          | <b>ordinary</b>  | 0.219   | 0.187   | 0.221   |
|                          | <b>adverse</b>   | 0.237   | 0.183   | 0.579   |
| <b>Physical activity</b> | <b>active</b>    | 0.265   | 0.155   | 0.188   |
|                          | <b>moderate</b>  | 0.414   | 0.488   | 0.466   |
|                          | <b>inactive</b>  | 0.321   | 0.357   | 0.346   |
| <b>Smoking</b>           | <b>non</b>       | 0.324   | 0.644   | 0.258   |
|                          | <b>ex</b>        | 0.561   | 0.208   | 0.206   |
|                          | <b>irregular</b> | 0.022   | 0.020   | 0.057   |
|                          | <b>regular</b>   | 0.094   | 0.128   | 0.479   |

**Table A2. Further descriptive statistics on latent classes.**

In addition to the reported information in the manuscript, this table shows further descriptive information concerning the three latent classes.

|                                   | <b>Latent Classes</b> |              |             |
|-----------------------------------|-----------------------|--------------|-------------|
|                                   | <b>I</b>              | <b>II</b>    | <b>III</b>  |
| <b>Overall sample (n, %)</b>      | 1366 (32.2)           | 1562 (36.9)  | 1310 (30.9) |
| <b>Male (n, %)</b>                | 1143 (83.7)           | 0 (0.0)      | 932 (71.1)  |
| <b>Female (n, %)</b>              | 223 (16.3)            | 1562 (100.0) | 378 (28.9)  |
| <b>Age (mean, SD)</b>             | 56.1 (11.9)           | 52.4 (13.0)  | 38.1 (9.8)  |
| <b>Education</b>                  |                       |              |             |
| <b>main school (n, %)</b>         | 610 (44.7)            | 944 (60.4)   | 736 (56.2)  |
| <b>middle school (n, %)</b>       | 281 (20.6)            | 378 (24.2)   | 325 (24.8)  |
| <b>grammar school (n, %)</b>      | 475 (34.8)            | 240 (15.4)   | 249 (19.0)  |
| <b>Alcohol consumption</b>        |                       |              |             |
| <b>no (n, %)</b>                  | 153 (11.2)            | 697 (44.6)   | 331 (25.3)  |
| <b>moderate (n, %)</b>            | 447 (32.7)            | 769 (49.2)   | 478 (36.5)  |
| <b>risky (n, %)</b>               | 766 (56.1)            | 96 (6.1)     | 501 (38.2)  |
| <b>Nutrition</b>                  |                       |              |             |
| <b>good (n, %)</b>                | 761 (55.7)            | 997 (63.8)   | 200 (15.3)  |
| <b>normal (n, %)</b>              | 306 (22.4)            | 297 (19.0)   | 282 (21.5)  |
| <b>bad (n, %)</b>                 | 299 (21.9)            | 268 (17.2)   | 828 (63.2)  |
| <b>Physical activity behavior</b> |                       |              |             |
| <b>active (n, %)</b>              | 377 (27.6)            | 241 (15.4)   | 243 (18.5)  |

### Clustered Health Behavior Patterns

|                         |            |             |            |
|-------------------------|------------|-------------|------------|
| <b>moderate (n, %)</b>  | 552 (40.4) | 771 (49.4)  | 609 (46.5) |
| <b>inactive (n, %)</b>  | 437 (32.0) | 550 (35.2)  | 458 (35.0) |
| <b>Smoking behavior</b> |            |             |            |
| <b>non (n, %)</b>       | 432 (31.6) | 1009 (64.6) | 299 (22.8) |
| <b>ex (n, %)</b>        | 830 (60.8) | 339 (21.7)  | 220 (16.8) |
| <b>irregular (n, %)</b> | 18 (1.3)   | 34 (2.2)    | 86 (6.6)   |
| <b>regular (n, %)</b>   | 86 (6.3)   | 180 (11.5)  | 705 (53.8) |
